# Supplementary material for: Validation of T-MoCA in the Screening of Mild Cognitive Impairment in Chinese Patients With Atrial Fibrillation
Source: PubMed Central journal article supplement (PMC9257241; doi:10.3389/fcvm.2022.896846), 2022-06-22
Supplement: Data_Sheet_1.pdf [file Data_Sheet_1.pdf]

## *Supplementary Material*

**Supplementary Table 1. Sensitivities and specificities of different T-MoCA thresholds for MCI**

| Thresholds    | Overall population<br>(n=101) |             | Low educational level<br>group(n=48) |             | High educational level<br>group(n=53) |             |
|---------------|-------------------------------|-------------|--------------------------------------|-------------|---------------------------------------|-------------|
|               | Sensitivity                   | Specificity | Sensitivity                          | Specificity | Sensitivity                           | Specificity |
| <b>For</b>    |                               |             |                                      |             |                                       |             |
| <b>T-MoCA</b> |                               |             |                                      |             |                                       |             |
| <b>18/19</b>  | 91.4                          | 33.3        | 94.1                                 | 19.4        | 88.9                                  | 45.7        |
| <b>17/18</b>  | 85.7                          | 48.5        | 94.1                                 | 29.0        | 77.8                                  | 65.7        |
| <b>16/17</b>  | <b>85.7</b>                   | <b>69.7</b> | 94.1                                 | 48.4        | <b>77.8</b>                           | <b>88.6</b> |
| <b>15/16</b>  | 65.7                          | 78.8        | <b>88.2</b>                          | <b>64.5</b> | 44.4                                  | 91.4        |
| <b>14/15</b>  | 48.6                          | 86.4        | 76.5                                 | 74.2        | 22.2                                  | 97.1        |
| <b>13/14</b>  | 40.0                          | 93.9        | 70.6                                 | 90.3        | 11.1                                  | 97.1        |

**Supplementary Table 2. Sensitivities and specificities of different MMSE thresholds for MCI**

| Thresholds<br>For<br>MMSE | Overall population<br>(n=101) |             | Low educational level<br>group(n=48) |             | High educational level<br>group(n=53) |             |
|---------------------------|-------------------------------|-------------|--------------------------------------|-------------|---------------------------------------|-------------|
|                           | Sensitivity                   | Specificity | Sensitivity                          | Specificity | Sensitivity                           | Specificity |
| <b>28/29</b>              | 85.7                          | 40.9        | 94.1                                 | 36.7        | 77.8                                  | 45.7        |
| <b>27/28</b>              | <b>74.2</b>                   | <b>62.1</b> | 94.1                                 | 50.0        | 55.6                                  | 74.3        |
| <b>26/27</b>              | 54.3                          | 75.8        | 64.7                                 | 63.3        | 44.4                                  | 88.6        |
| <b>25/26</b>              | 45.7                          | 89.4        | <b>64.7</b>                          | <b>86.7</b> | 27.8                                  | 94.3        |
| <b>24/25</b>              | 28.6                          | 95.5        | 47.1                                 | 96.7        | 11.1                                  | 94.3        |

**Supplementary Table 3. Parameters of ROC curves for T-MoCA in sensitivity analysis**

|                       | AUC(95%CI)      | Optimal threshold | Sensitivity | Specificity |
|-----------------------|-----------------|-------------------|-------------|-------------|
| <b>Overall</b>        | 0.80(0.70-0.89) | 16/17             | 86.2        | 69.4        |
| <b>Low education</b>  | 0.82(0.67-0.97) | 15/16             | 84.6        | 65.5        |
| <b>High education</b> | 0.84(0.72-0.96) | 16/17             | 81.3        | 87.9        |
